# Supplementary material for: When Subterranean Termites Challenge the Rules of Fungal Epizootics
Source: PubMed Central journal article supplement (PMC3314638; doi:10.1371/journal.pone.0034484), 2012-03-28

**Dataset S1.** Survivorship of groups of 50 termites in arenas filled with sand treated with *Metarhizium anisopliae* conidia. **A:** Survivorship from all of the 102 arenas. **B:** Average survivorship per treatment (densities are conidia/g of sand). Significant differences of survivorship among treatments are described in Table 1.

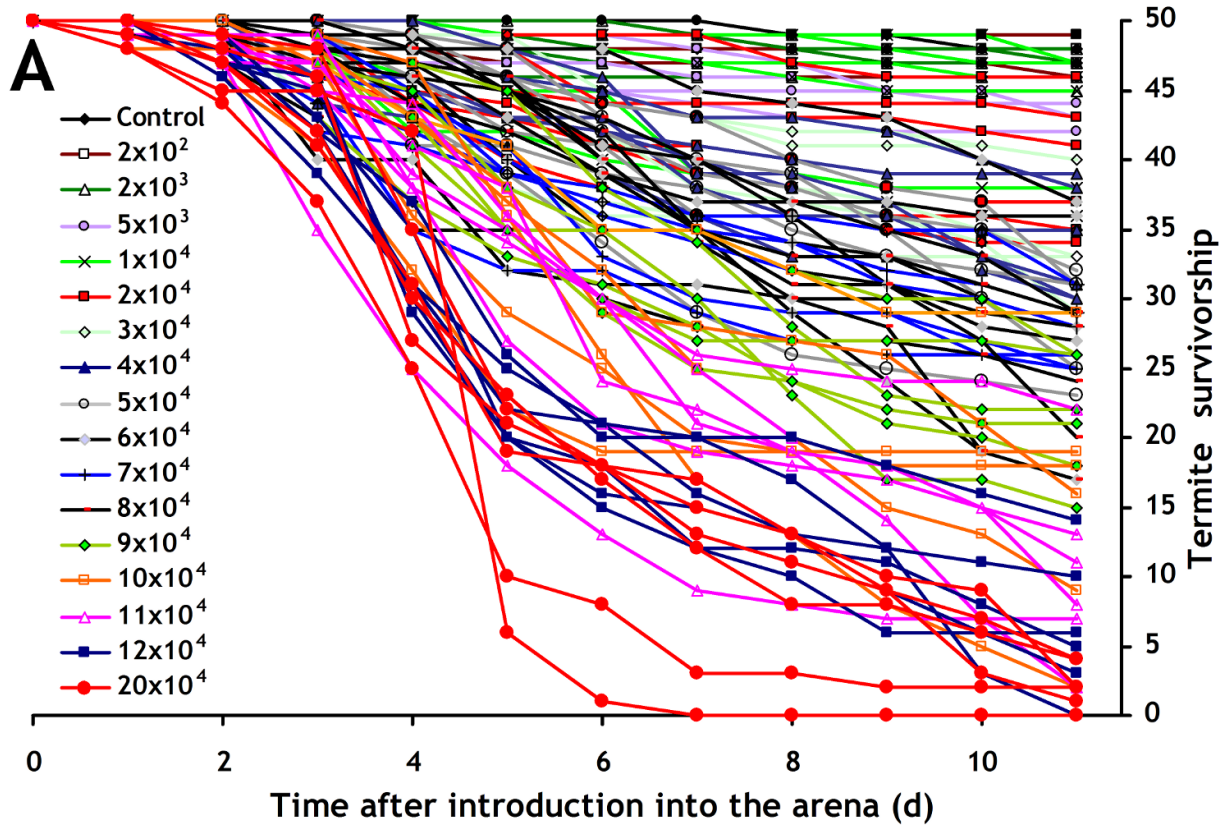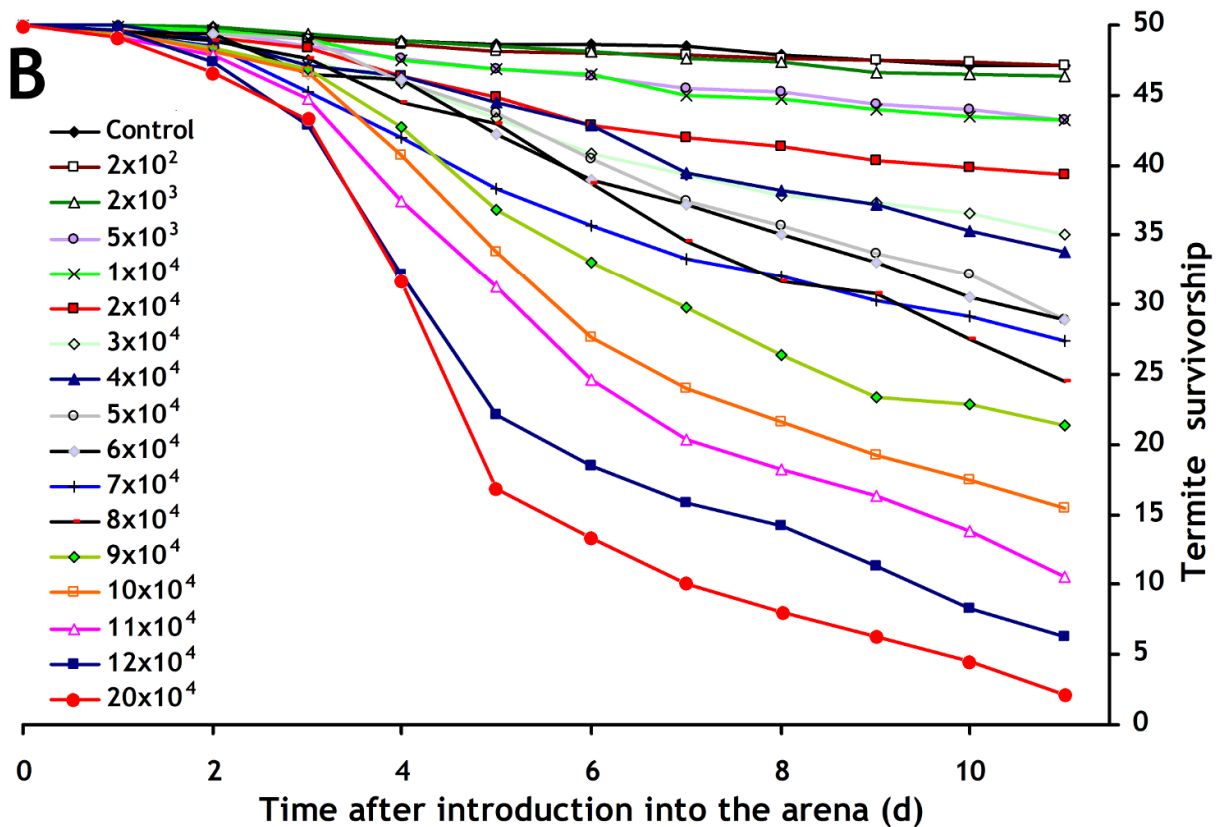

Supplement: pone.0034484.s001.pdf [file pone.0034484.s001.pdf]
