# Supplementary material for: When Subterranean Termites Challenge the Rules of Fungal Epizootics
Source: PubMed Central journal article supplement (PMC3314638; doi:10.1371/journal.pone.0034484), 2012-03-28
Supplement: pone.0034484.s002.pdf [file pone.0034484.s002.pdf]

Dataset S2. Probit analysis of termite's mortality at day 11 after introduction into the arenas

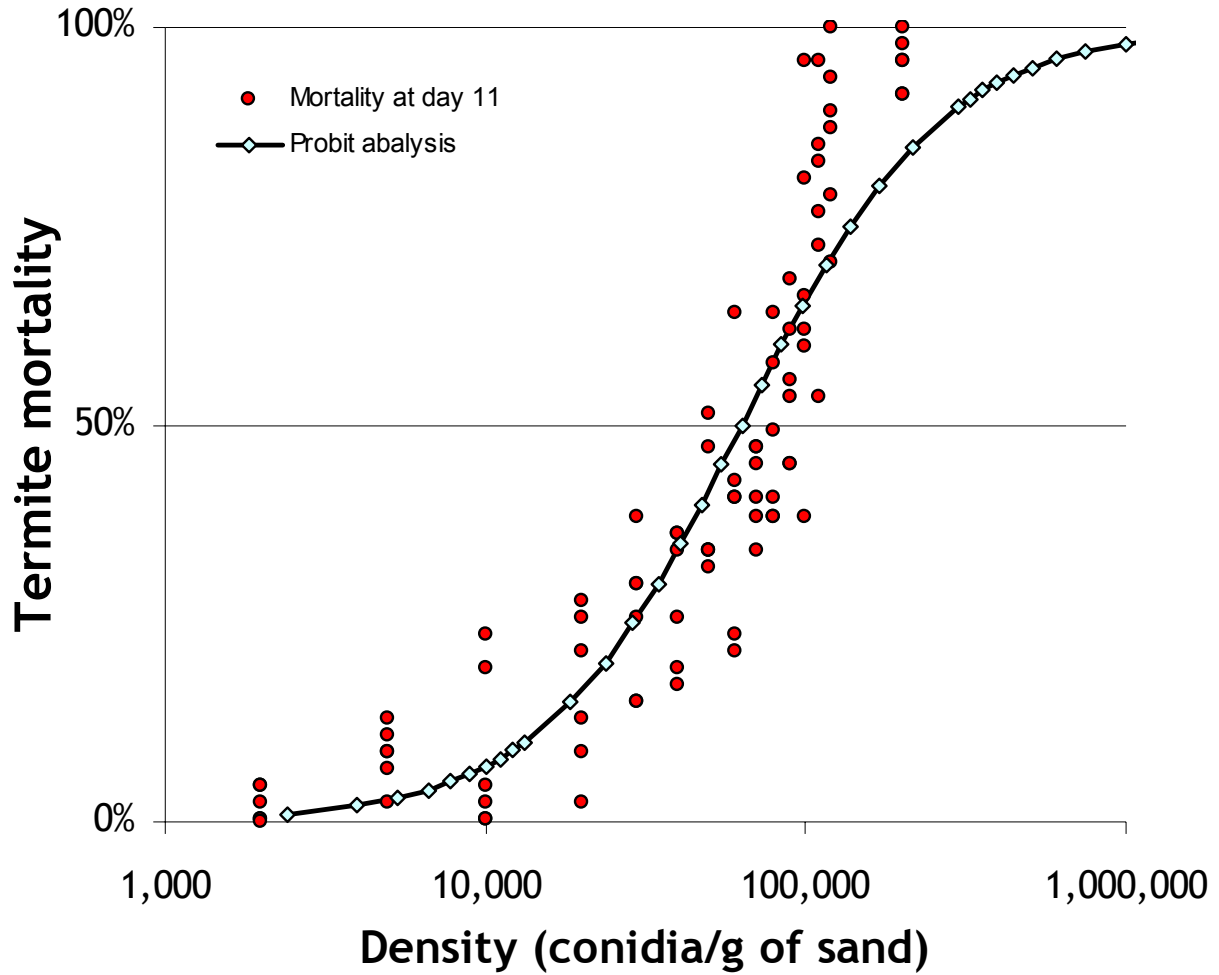

Probit analysis: Type III Analysis of Effects

| Effect      | DF | WaldChi-Square | Pr > ChiSq |
|-------------|----|----------------|------------|
| Log10(Dose) | 1  | 1508.4904      | <0.0001    |

Analysis of Parameter Estimates

| Parameter   | DF | Estimate | Standard error | 95% confidence limit |         | Chi-Square | Pr> ChiSq |
|-------------|----|----------|----------------|----------------------|---------|------------|-----------|
| Intercept   | 1  | -15.568  | 0.401          | -16.355              | -14.781 | 1503.74    | <0.0001   |
| Log10(dose) | 1  | 3.242    | 0.083          | 3.079                | 3.4064  | 1508.49    | <0.0001   |

Probit Model in Terms of Tolerance Distribution

| Mu      | Sigma   |
|---------|---------|
| 4.80084 | 0.30837 |

Estimated Covariance Matrix for Tolerance Parameters

|       | Mu       | Sigma    |
|-------|----------|----------|
| Mu    | 0.000060 | 0.000000 |
| Sigma | 0.000000 | 0.000063 |
