# Supplementary material for: When Subterranean Termites Challenge the Rules of Fungal Epizootics
Source: PubMed Central journal article supplement (PMC3314638; doi:10.1371/journal.pone.0034484), 2012-03-28
Supplement: pone.0034484.s003.pdf [file pone.0034484.s003.pdf]

**Dataset S3.** Distribution of cannibalized termites as function of the number of dead termites at 11 d.

$$f_{can} = a + b \times \ln(ex+f) + c \times \ln(ex+g)^2$$

- $a = -99.4979340$
- $b = 40.1511811$
- $c = -3.76595000$
- $e = 6.20952430$
- $g = 48.1261494$

Note: Coefficients for the curve fitting analysis are from groups of 50 termites (not percentages, as presented in the graphs)

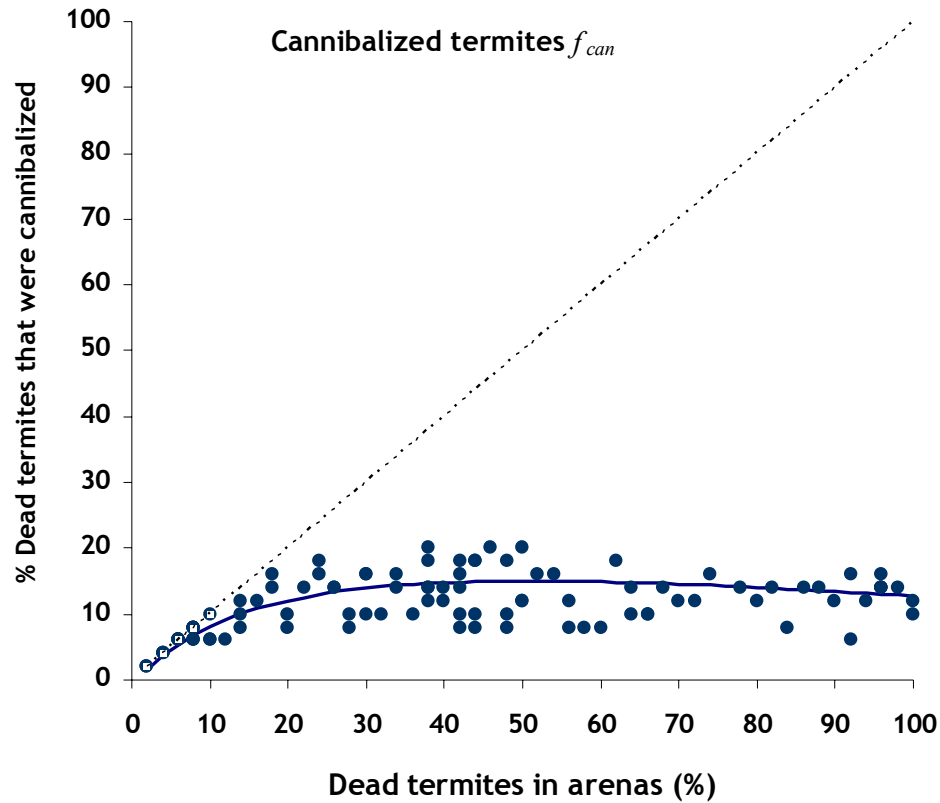

Fitting target of sum of squared absolute error = 248.67546

*Fit statistics*

- Degrees of freedom (error): 97
- Degrees of freedom (regression): 4
- R-squared: 0.49232
- R-squared adjusted: 0.47139
- Model F-statistic: 23.5170
- Model F-statistic p-value:  $1.30784e^{-13}$
- Model log-likelihood: -190.18170
- AIC: 3.82709
- BIC: 3.95577
- RMSE: 1.56140

*Absolute error*

- Minimum: -2.65790
- Maximum: 3.65507
- Mean: 0.33283
- Std. Err. of Mean: 0.15179
- Median: -0.15179
- Variance: 2.32721
- Std. Deviation: 1.52552
- Pop. Var.: 2.32721
- Pop. Std. Dev.: 1.52552
- Skew: 0.42162
- Kurtosis: -0.42111
