# Supplementary material for: When Subterranean Termites Challenge the Rules of Fungal Epizootics
Source: PubMed Central journal article supplement (PMC3314638; doi:10.1371/journal.pone.0034484), 2012-03-28
Supplement: pone.0034484.s004.pdf [file pone.0034484.s004.pdf]

**Dataset S4.** Distribution of buried termites as function of the number of dead termites at 11 d.

$$f_{bur} = a + bx^1 + cx^2 + ex^3 + gx^4 + hx^5$$

- $a = 0.445373433$
- $b = -0.3305326422$
- $c = 0.1031001398$
- $e = -0.0045182294$
- $g = 0.000103013$
- $h = -0.0000009.82$

Note: Coefficients for the curve fitting analysis are from groups of 50 termites (not percentages, as presented in the graphs)

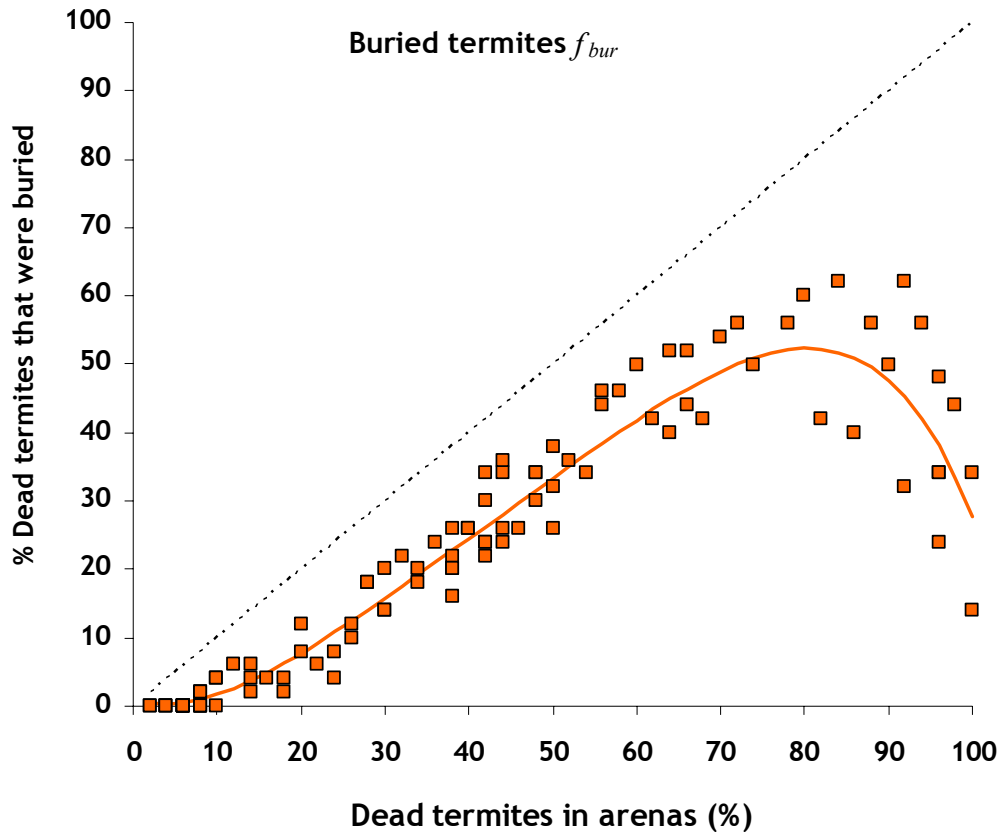

Fitting target of sum of squared absolute error = 705.81526

*Fit statistics*

- Degrees of freedom (error): 96
- Degrees of freedom (regression): 5
- R-squared: 0.92355
- R-squared adjusted: 0.92355
- Model F-statistic: 231.95468
- Model F-statistic p-value:  $<1e^{-16}$
- Model log-likelihood: -243.38514
- AIC: 4.88990
- BIC: 5.04431
- RMSE: 2.63054

*Absolute error*

- Minimum: -8.40667
- Maximum: 7.05882
- Mean: -0.22155
- Std. Err. of Mean: 0.26081
- Median: -2.45580
- Variance: 6.87067
- Std. Deviation: 2.62119
- Pop. Var.: 6.87067
- Pop. Std. Dev.: 2.62119
- Skew: -0.00318
- Kurtosis: 1.18913
