# Supplementary material for: When Subterranean Termites Challenge the Rules of Fungal Epizootics
Source: PubMed Central journal article supplement (PMC3314638; doi:10.1371/journal.pone.0034484), 2012-03-28
Supplement: pone.0034484.s005.pdf [file pone.0034484.s005.pdf]

**Dataset S5.** Distribution of non-buried termites as function of the number of dead termites at 11 d.

$$f_{nob} = a \times \exp(bx)$$

$$a = 0.019041202$$

$$b = 0.147230859$$

Note: Coefficients for the curve fitting analysis are from groups of 50 termites (not percentages, as presented in the graphs)

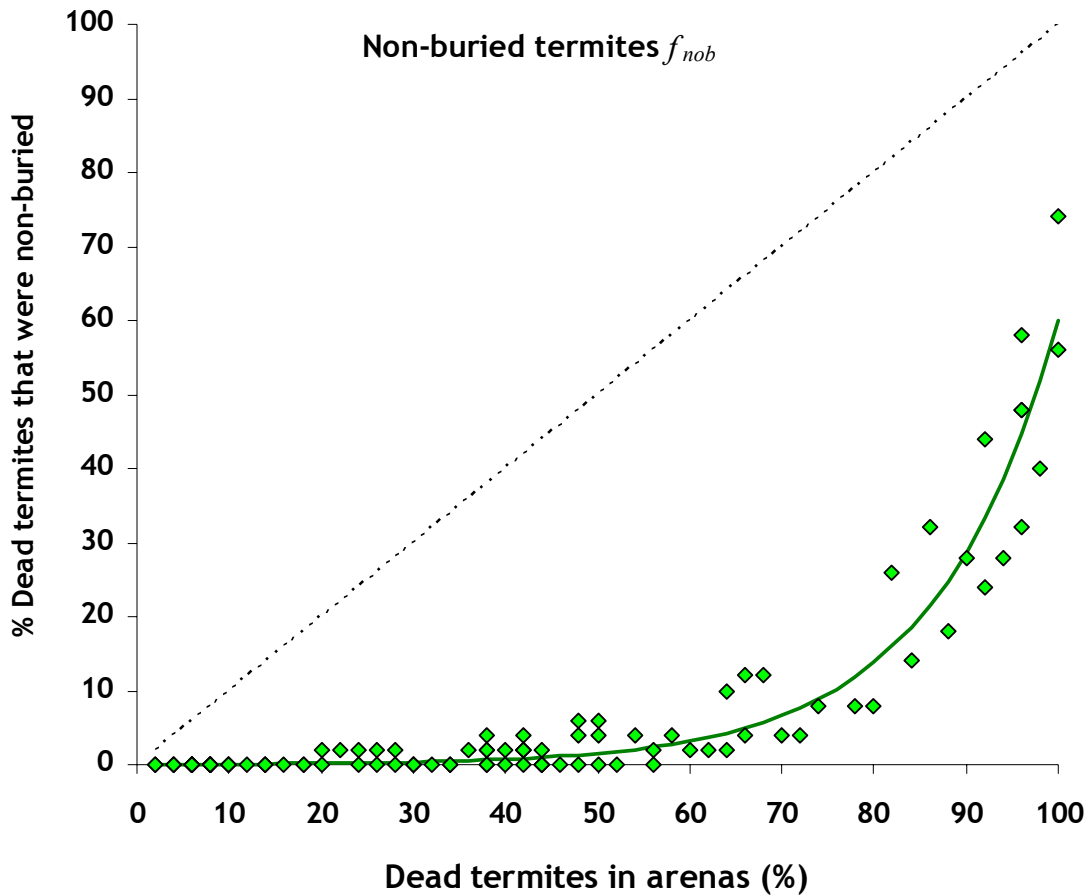

Fitting target of sum of squared absolute error = 409.28397

*Fit statistics*

Degrees of freedom (error): 100  
 Degrees of freedom (regression): 1  
 R-squared: 0.92389  
 R-squared adjusted: 0.92313  
 Model F-statistic: 1213.95734  
 Model F-statistic p-value:  $<1e^{-16}$   
 Model log-likelihood: -215.59292  
 AIC: 4.26652  
 BIC: 4.31799  
 RMSE: 2.00314

*Absolute error*

Minimum: -7.02412  
 Maximum: 6.33000  
 Mean: -0.12324  
 Std. Err. of Mean: 0.19894  
 Median: -0.03431  
 Variance: 3.99740  
 Std. Deviation: 1.99935  
 Pop. Var.: 3.99740  
 Pop. Std. Dev.: 1.99935  
 Skew: 0.33328  
 Kurtosis: 3.89085
