# Supplementary material for: When Subterranean Termites Challenge the Rules of Fungal Epizootics
Source: PubMed Central journal article supplement (PMC3314638; doi:10.1371/journal.pone.0034484), 2012-03-28
Supplement: pone.0034484.s006.pdf [file pone.0034484.s006.pdf]

**Dataset S6.** Confirmation of the validity of the curve fitting analysis.

The curve fitting analysis was considered valid for the three dependent variables if the following requirement was fulfilled, where *dead* is the total number of dead termites:

$$f_{can} + f_{bur} + f_{nob} = dead$$

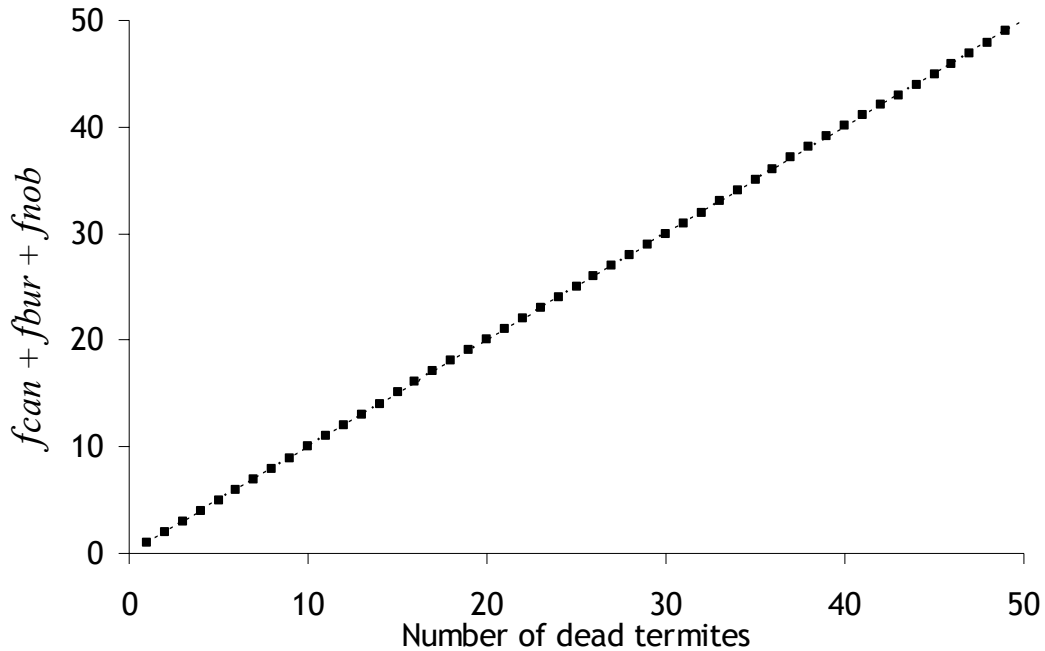

Fitting target of sum of squared absolute error = 0.18440

*Fit statistics*

Degrees of freedom (error): 49  
 Degrees of freedom (regression): 1  
 R-squared: 0.99998  
 R-squared adjusted: 0.99998  
 Model F-statistic: 2710347.21296  
 Model F-statistic p-value: <math>1e^{-16}</math>  
 Model log-likelihood: 69.119248  
 AIC: -2.68476  
 BIC: -2.60828  
 RMSE: 0.06072

|                    | <i>Absolute error</i>  |
|--------------------|------------------------|
| Minimum:           | -0.19635               |
| Maximum:           | 0.12546                |
| Mean:              | -1.752e <sup>-08</sup> |
| Std. Err. of Mean: | 0.00867                |
| Median:            | 0.00185                |
| Variance:          | 0.00369                |
| Std. Deviation:    | 0.06072                |
| Pop. Variance:     | 0.00369                |
| Pop. Std. Dev.:    | 0.06072                |
| Skew:              | -0.37649               |
| Kurtosis:          | 0.60947                |

*f<sub>can</sub> + f<sub>bur</sub> + f<sub>nob</sub> = dead* at all given points, thus the curve fitting analysis was validated.
